# Supplementary material for: A pentapeptide enabled AL3810 liposome-based glioma-targeted therapy with immune opsonic effect attenuated
Source: PubMed Central journal article supplement — Acta Pharm Sin B. 2020 Aug 13;11(1):283–99. doi: 10.1016/j.apsb.2020.07.024 (PMC7838056; doi:10.1016/j.apsb.2020.07.024), 2020-08-13
Supplement: mmc1.pdf [file mmc1.pdf]

## Supporting Information for

### ORIGINAL ARTICLE

#### **A pentapeptide enabled AL3810 liposome-based glioma-targeted therapy with immune opsonic effect attenuated**

Jinyang Li<sup>a</sup>, Jiasheng Lu<sup>a</sup>, Haiyan Guo<sup>a</sup>, Jianfen Zhou<sup>a</sup>, Songli Wang<sup>a</sup>, Kuan Jiang<sup>a</sup>, Zhilan Chai<sup>a</sup>, Shengyu Yao<sup>a</sup>, Xiaoyi Wang<sup>a</sup>, Linwei Lu<sup>d</sup>, Cao Xie<sup>a</sup>, Yi Chen<sup>b</sup>, Weiyue Lu<sup>a,c,d,e,\*</sup>

<sup>a</sup>*Department of Pharmaceutics, School of Pharmacy, Fudan University & Key Laboratory of Smart Drug Delivery (Fudan University), Ministry of Education and PLA, Shanghai 201203, China*

<sup>b</sup>*Chinese Academy of Sciences Shanghai Institute of Materia Medica , Shanghai 201203 , China*

<sup>c</sup>*State Key Laboratory of Medical Neurobiology and MOE Frontiers Center for Brain Science, Institutes of Brain Science, Fudan University, Shanghai 200032, China*

<sup>d</sup>*The Institutes of Integrative Medicine of Fudan University, Shanghai 200041, China*

<sup>e</sup>*Minhang Branch, Zhongshan Hospital and Institute of Fudan-Minghang Academic Health System, Minghang Hospital, Fudan University, Shanghai 201199, China*

\*Corresponding author. Tel: +86 21 5198 0090.

E-mail address: wylu@shmu.edu.cn (Weiyue Lu).

Running title: Immunocompatible mn-modified liposome for glioma-targeted therapy

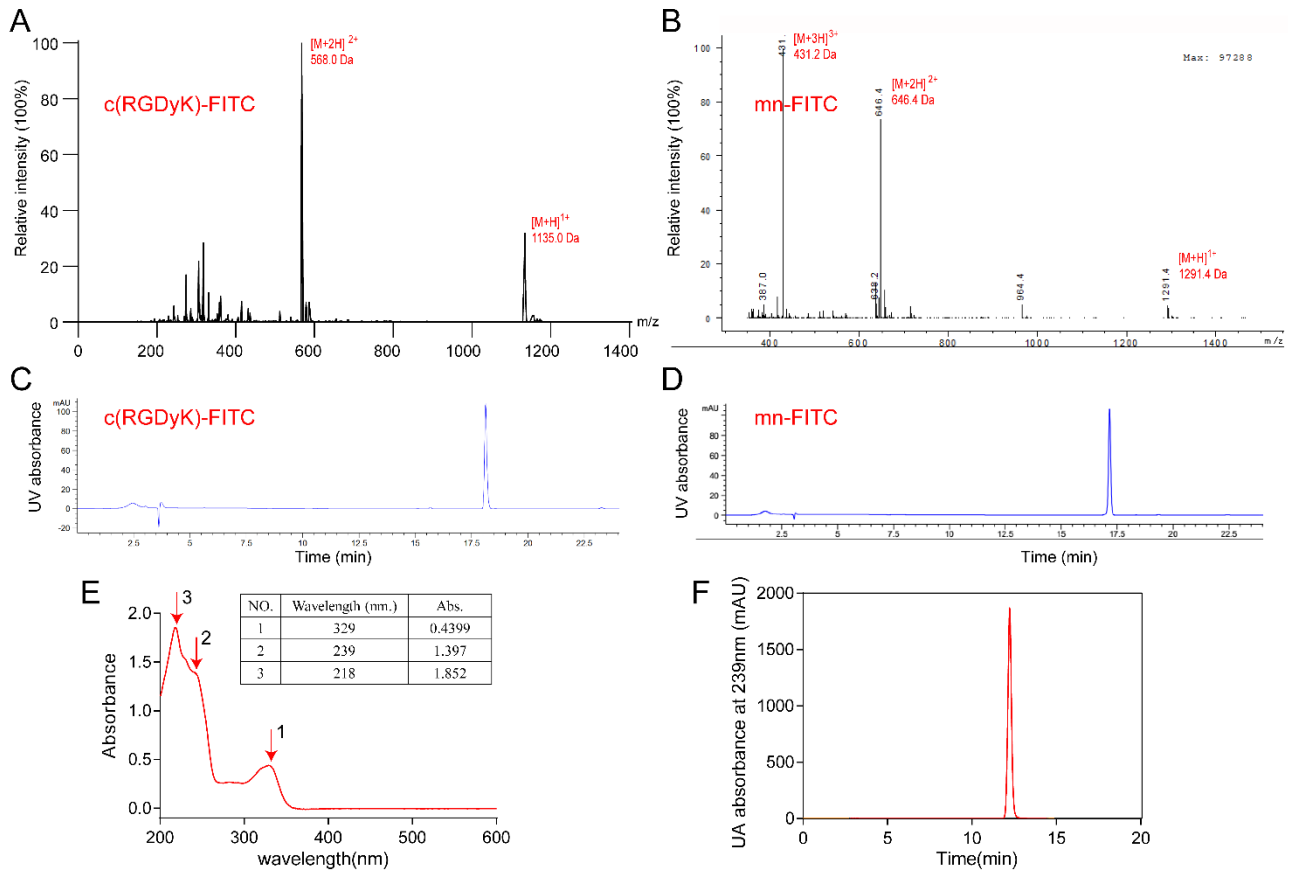

**Figure S1** Physicochemical characterization of peptide-fluorescein and AL3810. (A)–(D) Analysis of conjugates c(RGDyK)-FITC and mn-FITC by ESI-MS (A), (B) and RP-HPLC (C), (D). (E) UV scanning of molecule AL3810 in 200 –600 nm wavelength. (F) Analysis of molecule AL3810 by RP-HPLC.

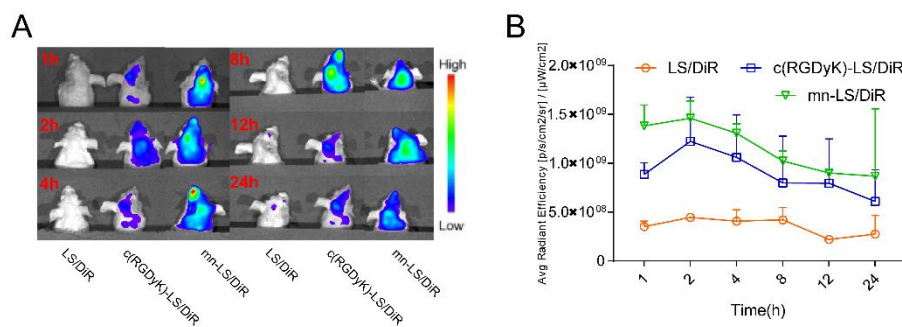

**Figure S2** *In vivo* glioma targeting ability. (A) and (B) *In vivo* fluorescence imaging of glioma orthotopic xenograft at predesignated time point after intravenous injection with DiR-labeled liposomes (A). Semi-quantitative ROI analysis of *in vivo* fluorescent images of the brain at different time points (B). Data are mean ± SD,  $n = 3$ .

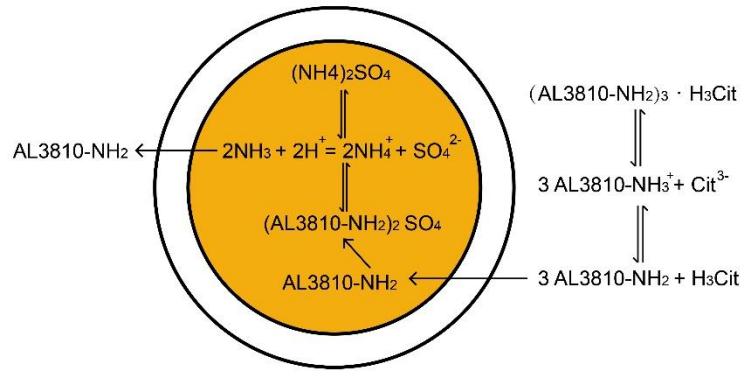

**Figure S3** The illustration of liposomal AL3810 loading principle by ammonium sulfate gradient method.

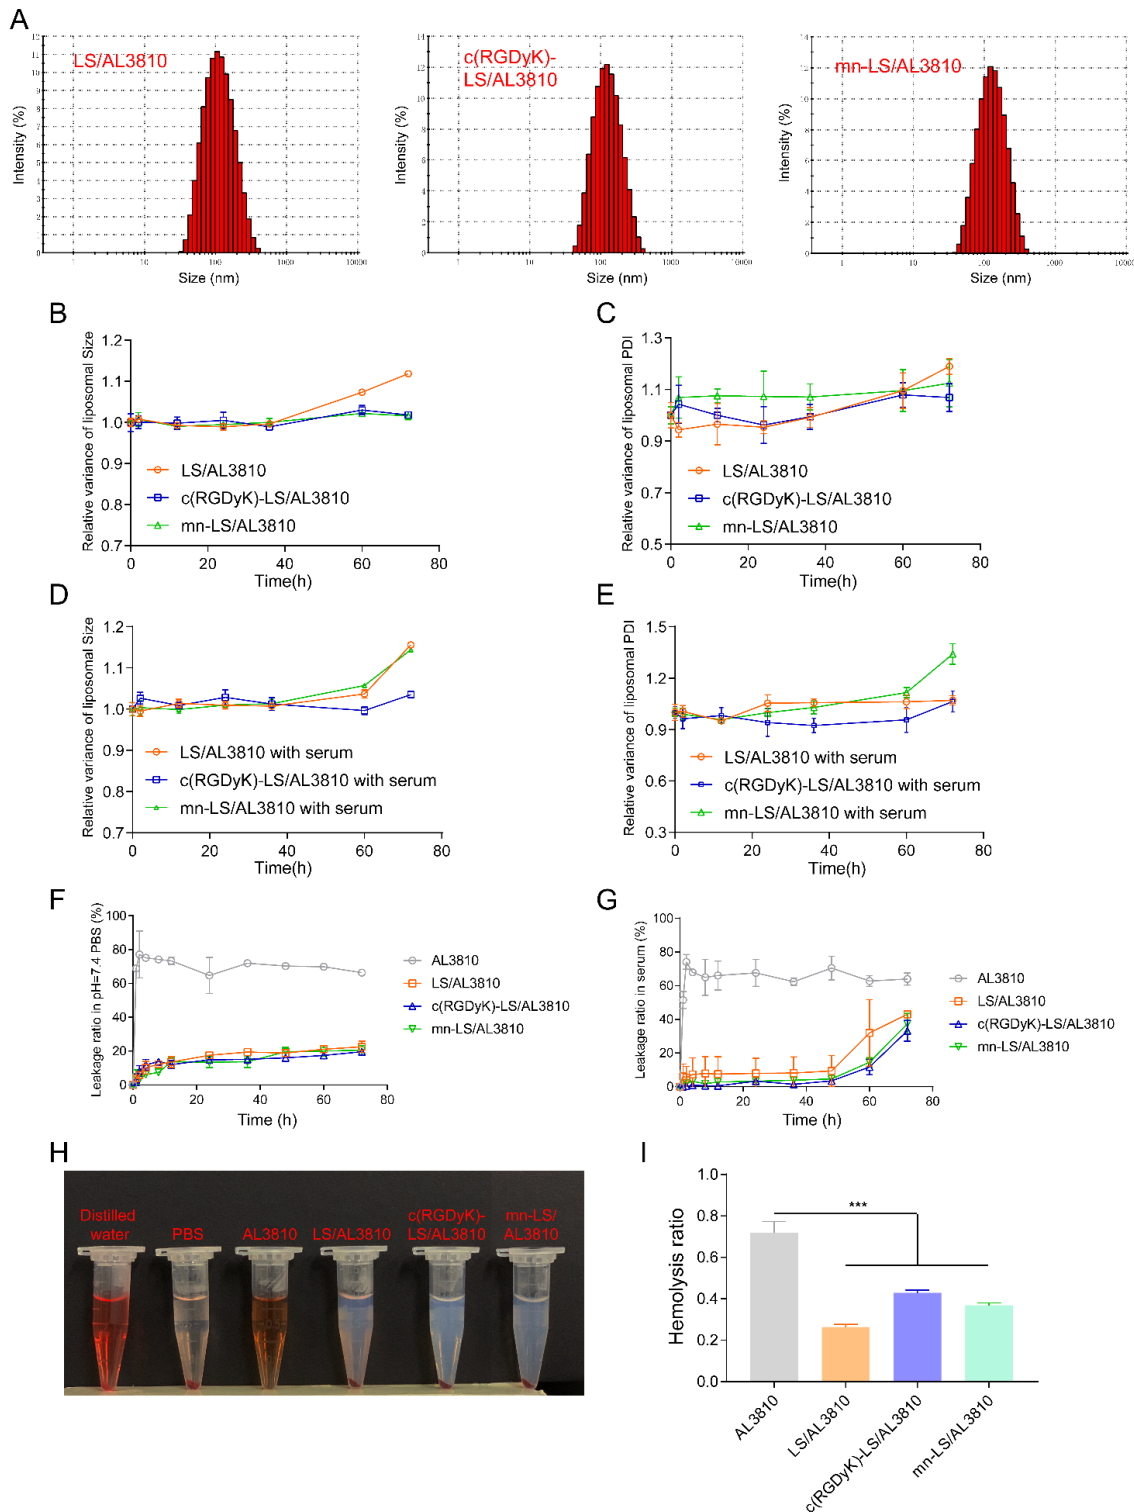

**Figure S4** Characterization of AL3810-loaded liposome. (A) Size distribution of AL3810-loaded liposomes detected by DLS. Stability of AL3810-loaded liposomes in size (B) and PDI (C) after incubation in 37 °C. Stability of AL3810-loaded liposomes in size (D) and PDI (E) after incubation with 50% serum in 37 °C. *In vitro* leakage kinetics of AL3810 from AL3810-loaded liposomes at 37 °C in PBS (F) or in 30% serum (G). Hemolytic test of AL3810 formulations (H). Hemolysis ratio was defined as the percentages of distilled water group, which was set at 100% (I). Data are mean  $\pm$  SD,  $n = 3$ ; \*\*\*  $P < 0.001$ .

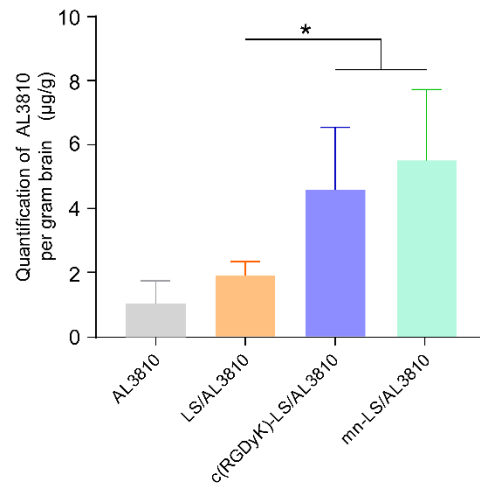

**Figure S5** Brain penetration of ligand-tethered AL3810-loaded liposomes. AL3810 concentration of different AL3810 formulations in brain of U87 MG orthotopic xenograft bearing nude mice at 4 h post injection. Data are mean  $\pm$ SD,  $n = 3$ ; \*  $P < 0.05$ .

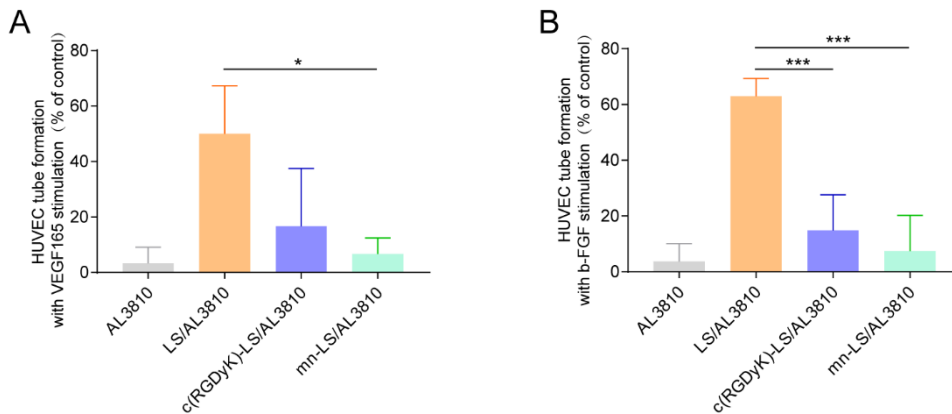

**Figure S6** Semiquantitative analysis of *in vitro* angiogenesis inhibition of AL3810 formulations. (A)–(B) destruction of different AL3810 loaded liposomes on neovascularization formed by HUVECs with VEGF165 (A) and b-FGF (B) stimuli. Cells incubated with drug-free DMEM served as the control. Data are presented as the percentages of the control group, which was set at 100%. Data are mean  $\pm$ SD,  $n = 3$ ; \*  $P < 0.05$ , \*\*\*  $P < 0.001$ .

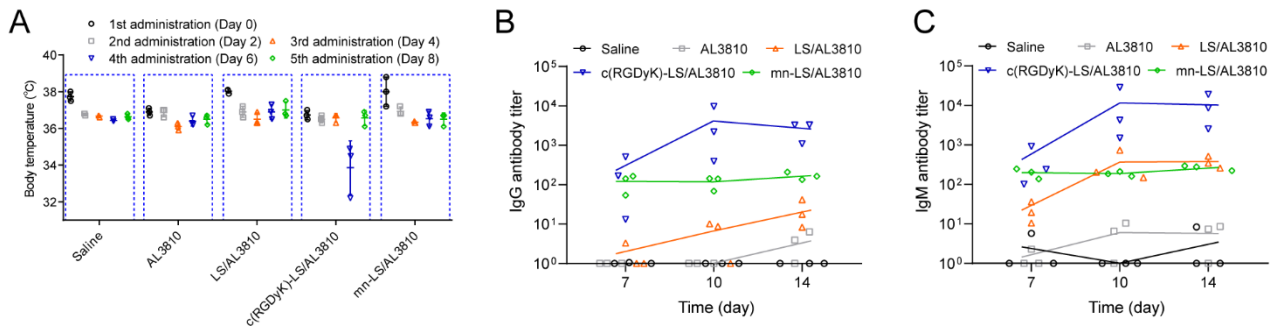

**Figure S7** Biosafety assessment of the glioma-targeted AL3810-loaded liposomes on ICR mice. (A) The body temperature record of ICR mice 0.5 h post various remedies at AL3810 each dose of 4 mg/kg. Data was collected from abdominal thermometer. Time course of anti-liposome IgG (B) and IgM (C) antibody production of ICR mice on day 7, 10 and 14 from onset of administration. Blood was sampled from the retro-orbital sinus and analyzed *via* ELISA assay. Corresponding liposome served as antigen. Data are mean  $\pm$  SD,  $n = 3$ .

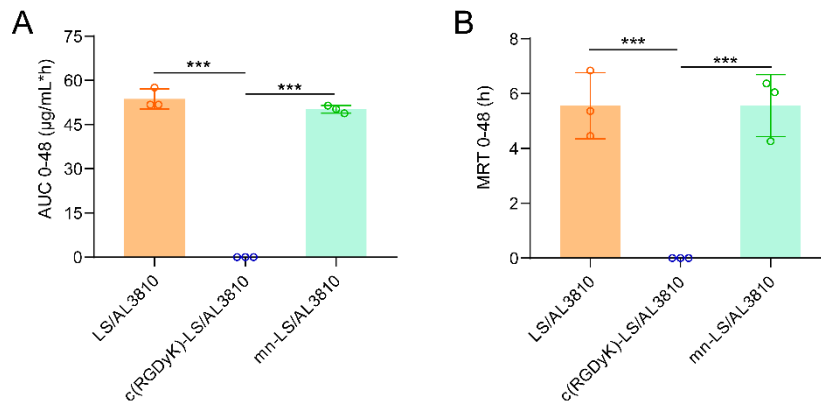

**Figure S8** AUC<sub>0-48</sub> (A) and MRT<sub>0-48</sub> (B) of various AL3810-loaded liposomal formulations calculated by DAS 2.0. Data are mean  $\pm$  SD,  $n = 3$ ; \*\*\*  $P < 0.001$ .

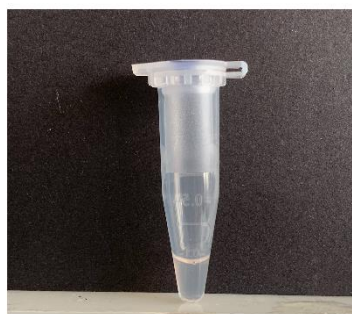

**Figure S9** Specificity between immune opsonin and peptide-tethered liposome. The photograph of 50  $\mu$ L mn-LS/AL3810 incubated with 50  $\mu$ L plasma sampled from c(RGDyK)-LS/AL3810 injected SD rat at 0 h.

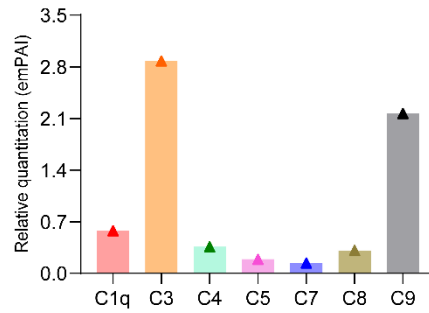

**Figure S10** The exponentially modified Protein Abundance Index (emPAI) of complements in group d using nano-LC/MS/MS.

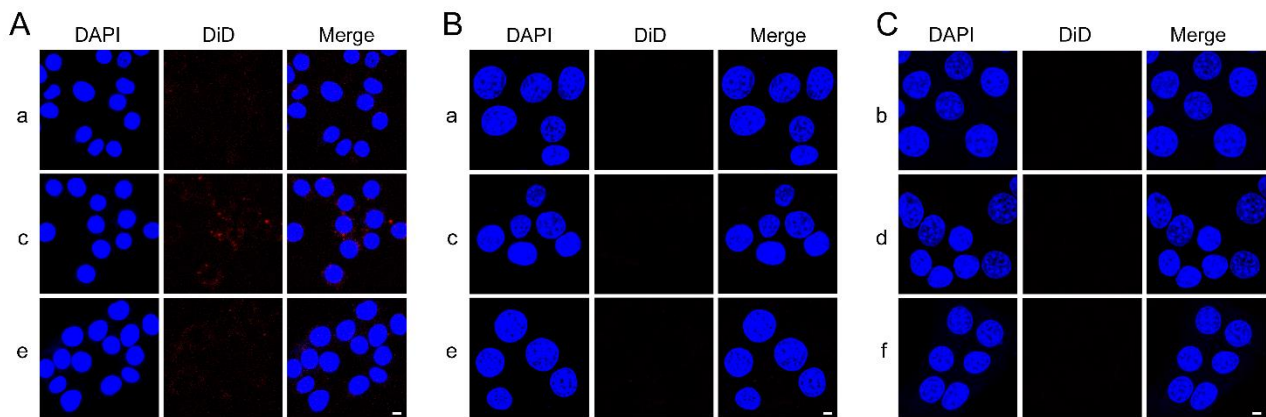

**Figure S11** Reciprocity of immune opsonized liposomes with macrophage and hepatocyte. (A) The cellular uptake of pristine DiD-loaded liposomes by RAW264.7 cells at 37 °C for 4 h. (B) The cellular uptake of pristine DiD-loaded liposomes by AML12 cells at 37 °C for 4 h. (C) The cellular uptake of immune opsonized DiD-loaded liposomes by AML12 cells at 37 °C for 4 h. Intracellular fluorescence was captured by a confocal laser scanning microscope. Scale bar = 5  $\mu$ m. Group a: pristine LS/AL3810; Group b: LS/AL3810 with 10% volume of plasma sampled from LS/AL3810 injected group at 0 h; Group c: pristine c(RGDyK)-LS/AL3810; Group d: c(RGDyK)-LS/AL3810 with 10% volume of plasma sampled from c(RGDyK)-LS/AL3810 injected group at 0 h; Group e: pristine mn-LS/AL3810; Group f: mn-LS/AL3810 with 10% volume of plasma sampled from mn-LS/AL3810 injected group at 0 h.

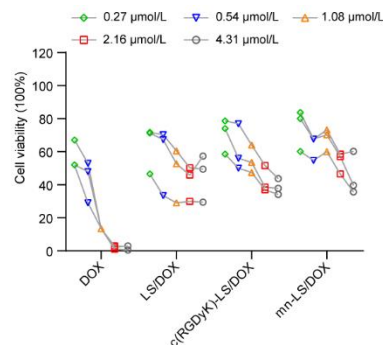

**Figure S12** Anti-proliferative effect of DOX liposomal formulations on RAW264.7 cells after 48 h exposure. Cell viability was measured by MTT assay.

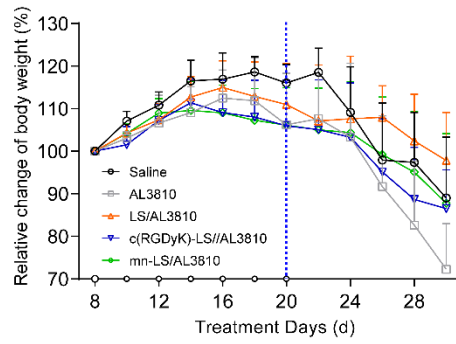

**Figure S13** Body weight change of nude mice bearing U87 MG orthotopic xenograft receiving different AL3810 formulations. The relative body weight was calculated as the ratio of body weight to the initial body weight. Data are mean  $\pm$ SD,  $n = 10$ .



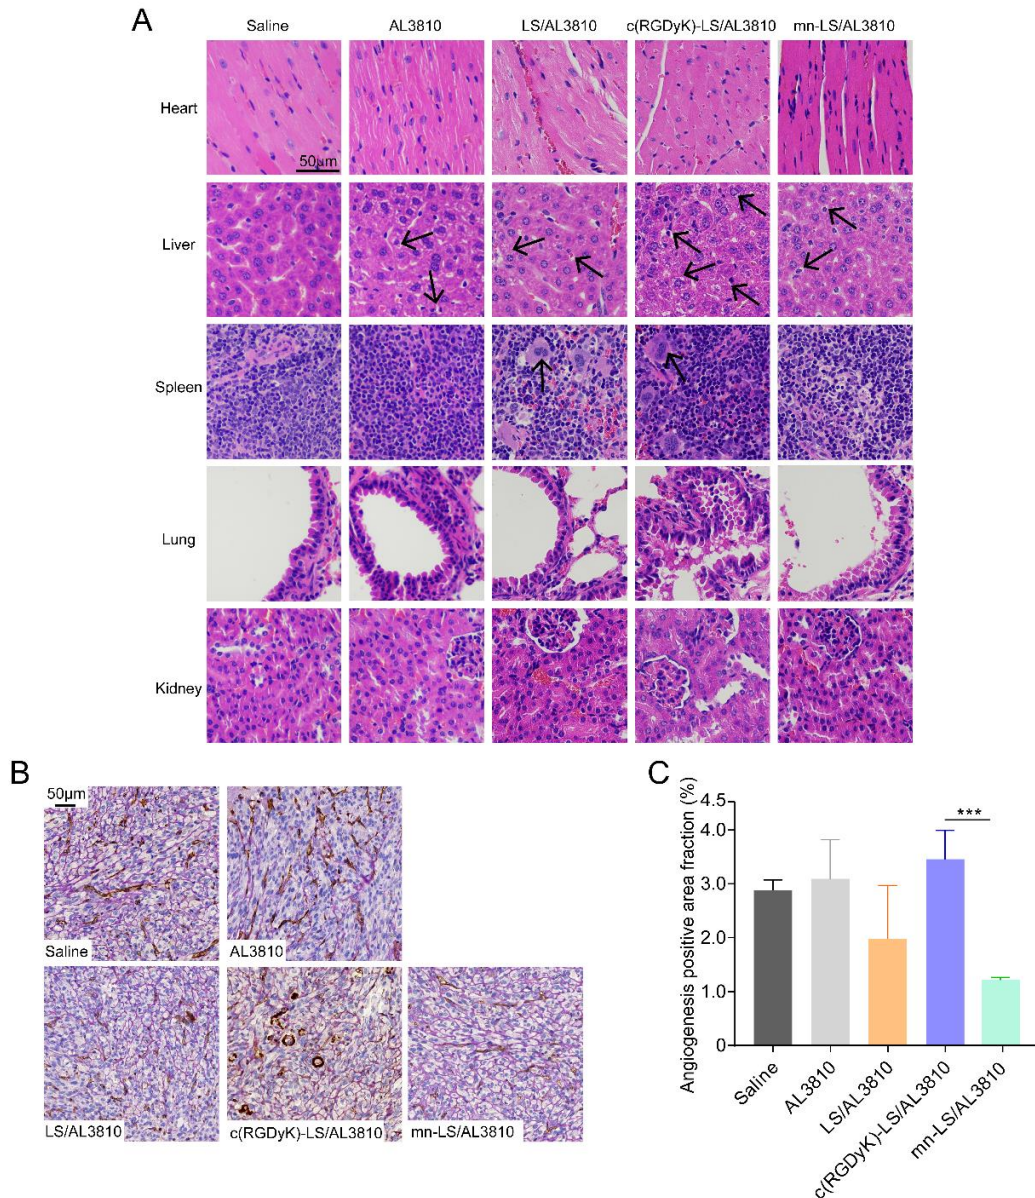

**Figure S14** Safety and efficacy evaluation of AL3810 liposome treatment course. (A) Hematoxylin-eosin staining of organ sections of the mice bearing U87 MG orthotopic xenograft after various treatments. The black arrows pointed at hepatocytes cytoplasmic loosening in liver sections. The black arrows pointed at multinucleated giant cells in spleen sections. CD31 immunohistochemical staining of the glioma tissues of the mice bearing U87 MG orthotopic xenograft after various treatments (B). The amount of glioma angiogenesis was counted within three randomly selected vision fields (C). Data are mean  $\pm$  SD,  $n = 3$ ; \*\*\*  $P < 0.001$ .

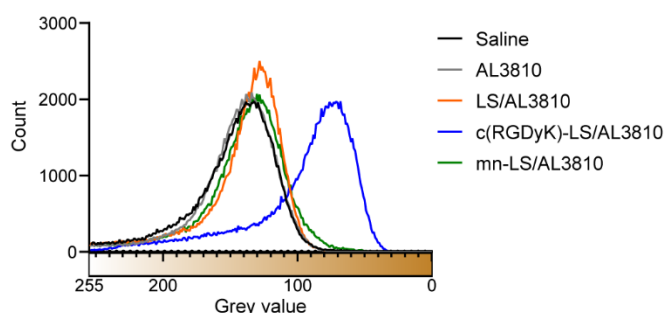

**Figure S15** Histogram of the positive area of C3 deposition in liver after treating various AL3810 formulations.

**Table S1** Size distribution, encapsulation efficiency and loading capacity of AL3810-loaded liposomes.

| Formulations       | Size (nm)   | PDI         | Encapsulation efficiency ( % ) | Loading capacity ( % ) |
|--------------------|-------------|-------------|--------------------------------|------------------------|
| LS/AL3810          | 100.12±1.03 | 0.195±0.010 | 96.32±2.19                     | 6.43±0.14              |
| mn-LS/AL3810       | 117.43±0.81 | 0.164±0.006 | 94.68±3.05                     | 5.94±0.18              |
| c(RGDyK)-LS/AL3810 | 111.87±2.43 | 0.169±0.002 | 95.12±1.96                     | 5.99±0.12              |

The size distribution of AL3810-loaded liposomes measured by dynamic light scattering. The encapsulation efficiency (EE) and loading capacity (LC) of AL3810-loaded liposomes. Data are represented with mean ± SD ( $n = 3$ ).

**Table S2** The list of identified proteins in Band-1.

| #  | prot_acc   | prot_desc                                                                        | prot_score | prot_mass | prot_matches |
|----|------------|----------------------------------------------------------------------------------|------------|-----------|--------------|
| 1  | A0A0G2JVP4 | Immunoglobulin heavy constant mu OS=Rattus norvegicus OX=10116 GN=Ighm PE=1 SV=1 | 4938       | 52360     | 260          |
| 2  | A0A0G2JSH5 | Serum albumin OS=Rattus norvegicus OX=10116 GN=Alb PE=1 SV=1                     | 1817       | 70710     | 83           |
| 3  | M0RBF1     | Complement C3 OS=Rattus norvegicus OX=10116 GN=C3 PE=1 SV=1                      | 1235       | 187746    | 68           |
| 4  | F1LZ11     | Ig-like domain-containing protein OS=Rattus norvegicus OX=10116 PE=1 SV=1        | 937        | 14286     | 38           |
| 5  | P12346     | Serotransferrin OS=Rattus norvegicus OX=10116 GN=Tf PE=1 SV=3                    | 703        | 78512     | 39           |
| 6  | P04639     | Apolipoprotein A-I OS=Rattus norvegicus OX=10116 GN=Apoa1 PE=1 SV=2              | 404        | 30100     | 32           |
| 7  | A0A0G2JV52 | Complement C4A (Fragment) OS=Rattus norvegicus OX=10116 GN=C4a PE=4 SV=4         | 342        | 151663    | 16           |
| 8  | A0A0G2K151 | Apolipoprotein E OS=Rattus norvegicus OX=10116 GN=ApoE PE=1 SV=1                 | 337        | 41573     | 12           |
| 9  | A0A0G2K290 | Ig-like domain-containing protein OS=Rattus norvegicus OX=10116 PE=4 SV=1        | 308        | 14124     | 10           |
| 10 | F7F389     | Complement component C9 OS=Rattus norvegicus OX=10116 GN=C9 PE=1 SV=1            | 305        | 66555     | 16           |
| 11 | A0A0G2JVX7 | Apolipoprotein A-IV OS=Rattus norvegicus OX=10116 GN=Apoa4 PE=1 SV=1             | 285        | 44335     | 13           |
| 12 | A0A0G2K4I8 | Ig-like domain-containing protein OS=Rattus norvegicus OX=10116 PE=1 SV=1        | 270        | 12790     | 16           |
| 13 | M0R9U2     | Ig-like domain-containing protein OS=Rattus norvegicus OX=10116 PE=1 SV=1        | 263        | 10952     | 9            |
| 14 | F1LWD1     | Ig-like domain-containing protein OS=Rattus norvegicus OX=10116 PE=1 SV=3        | 262        | 14376     | 9            |
| 15 | P20762     | Ig gamma-2C chain C region OS=Rattus norvegicus OX=10116 PE=2 SV=1               | 251        | 37062     | 14           |
| 16 | F1M3H2     | Ig-like domain-containing protein OS=Rattus norvegicus OX=10116 PE=4 SV=2        | 250        | 11295     | 16           |

|    |            |                                                                                              |     |        |    |
|----|------------|----------------------------------------------------------------------------------------------|-----|--------|----|
| 17 | A0A096P6L8 | Fibronectin OS=Rattus norvegicus OX=10116 GN=Fn1 PE=1 SV=2                                   | 242 | 275925 | 19 |
| 18 | P20059     | Hemopexin OS=Rattus norvegicus OX=10116 GN=Hpx PE=1 SV=3                                     | 236 | 52060  | 17 |
| 19 | D4ACR1     | Ig-like domain-containing protein OS=Rattus norvegicus OX=10116 PE=1 SV=2                    | 226 | 13876  | 6  |
| 20 | A0A096P6L9 | Complement C5 OS=Rattus norvegicus OX=10116 GN=C5 PE=1 SV=2                                  | 226 | 190786 | 13 |
| 21 | Q7TQ70     | Ac1873 OS=Rattus norvegicus OX=10116 GN=Fga PE=1 SV=1                                        | 225 | 87344  | 12 |
| 22 | P14046     | Alpha-1-inhibitor 3 OS=Rattus norvegicus OX=10116 GN=A1i3 PE=1 SV=1                          | 225 | 165038 | 17 |
| 23 | A0A0G2JUY4 | Ig-like domain-containing protein OS=Rattus norvegicus OX=10116 PE=1 SV=1                    | 214 | 12526  | 6  |
| 24 | F1LWDO     | Ig-like domain-containing protein OS=Rattus norvegicus OX=10116 PE=1 SV=2                    | 213 | 12027  | 9  |
| 25 | M0R7Q2     | Ig-like domain-containing protein OS=Rattus norvegicus OX=10116 PE=1 SV=2                    | 212 | 13315  | 8  |
| 26 | P02680     | Fibrinogen gamma chain OS=Rattus norvegicus OX=10116 GN=Fgg PE=1 SV=3                        | 205 | 51228  | 17 |
| 27 | A0A0G2JYK0 | Serine protease inhibitor A3N OS=Rattus norvegicus OX=10116 GN=LOC299282 PE=1 SV=1           | 200 | 68226  | 10 |
| 28 | D3ZC54     | Ig-like domain-containing protein OS=Rattus norvegicus OX=10116 PE=1 SV=2                    | 200 | 13293  | 6  |
| 29 | A0A0G2JZW1 | Ig-like domain-containing protein OS=Rattus norvegicus OX=10116 PE=1 SV=1                    | 183 | 24607  | 6  |
| 30 | A0A0G2K3G0 | Histidine-rich glycoprotein OS=Rattus norvegicus OX=10116 GN=Hrg PE=1 SV=1                   | 181 | 61358  | 8  |
| 31 | M0RDF2     | Ig-like domain-containing protein OS=Rattus norvegicus OX=10116 PE=1 SV=1                    | 177 | 11290  | 8  |
| 32 | D4A5Y5     | Ig-like domain-containing protein OS=Rattus norvegicus OX=10116 PE=1 SV=2                    | 175 | 13184  | 9  |
| 33 | F1LXY6     | Ig-like domain-containing protein OS=Rattus norvegicus OX=10116 PE=1 SV=2                    | 163 | 11354  | 9  |
| 34 | F1M3E9     | Ig-like domain-containing protein OS=Rattus norvegicus OX=10116 PE=4 SV=3                    | 160 | 13894  | 6  |
| 35 | F1M3X3     | Ig-like domain-containing protein OS=Rattus norvegicus OX=10116 PE=4 SV=2                    | 153 | 13177  | 6  |
| 36 | P24090     | Alpha-2-HS-glycoprotein OS=Rattus norvegicus OX=10116 GN=AhsG PE=1 SV=2                      | 151 | 38757  | 6  |
| 37 | P05544     | Serine protease inhibitor A3L OS=Rattus norvegicus OX=10116 GN=Serpina3l PE=1 SV=3           | 147 | 46419  | 10 |
| 38 | D3ZJW6     | RCG21066 OS=Rattus norvegicus OX=10116 GN=rCG_21066 PE=1 SV=1                                | 130 | 13226  | 5  |
| 39 | A0A0G2K548 | A-kinase-anchoring protein 9 OS=Rattus norvegicus OX=10116 GN=Akap9 PE=1 SV=1                | 130 | 444371 | 8  |
| 40 | A0A0G2JXB7 | Ig-like domain-containing protein OS=Rattus norvegicus OX=10116 PE=1 SV=1                    | 128 | 13110  | 9  |
| 41 | D4A3D1     | Ig-like domain-containing protein OS=Rattus norvegicus OX=10116 PE=4 SV=2                    | 124 | 11253  | 8  |
| 42 | Q6P0K8     | Junction plakoglobin OS=Rattus norvegicus OX=10116 GN=Jup PE=1 SV=1                          | 123 | 82490  | 10 |
| 43 | Q63041     | Alpha-1-macroglobulin OS=Rattus norvegicus OX=10116 GN=A1m PE=1 SV=1                         | 122 | 168388 | 17 |
| 44 | F1M1R0     | Ig-like domain-containing protein OS=Rattus norvegicus OX=10116 GN=LOC690813 PE=1 SV=2       | 116 | 15055  | 4  |
| 45 | P14480     | Fibrinogen beta chain OS=Rattus norvegicus OX=10116 GN=Fgb PE=1 SV=4                         | 113 | 54828  | 11 |
| 46 | A0A0G2K1T8 | Serine protease inhibitor A3N OS=Rattus norvegicus OX=10116 GN=LOC299282 PE=1 SV=1           | 112 | 46447  | 4  |
| 47 | A0A0G2K3K2 | Actin, cytoplasmic 1 OS=Rattus norvegicus OX=10116 GN=Actb PE=1 SV=1                         | 109 | 42401  | 4  |
| 48 | A0A0G2K980 | Ig-like domain-containing protein OS=Rattus norvegicus OX=10116 PE=1 SV=1                    | 109 | 11344  | 6  |
| 49 | A0A0G2JY31 | Alpha-1-antiproteinase OS=Rattus norvegicus OX=10116 GN=Serpina1 PE=1 SV=1                   | 108 | 46264  | 11 |
| 50 | Q3KR94     | Vitronectin OS=Rattus norvegicus OX=10116 GN=Vtn PE=1 SV=1                                   | 107 | 55489  | 4  |
| 51 | A0A0G2JSK1 | RCG20603 OS=Rattus norvegicus OX=10116 GN=Serpina3c PE=3 SV=1                                | 104 | 46676  | 9  |
| 52 | Q4KM75     | CD5 antigen-like OS=Rattus norvegicus OX=10116 GN=Cd5l PE=1 SV=1                             | 95  | 39375  | 8  |
| 53 | D3ZBB2     | Ig-like domain-containing protein OS=Rattus norvegicus OX=10116 PE=1 SV=3                    | 95  | 13251  | 4  |
| 54 | D3ZFC6     | Inter-alpha-trypsin inhibitor heavy chain 4 OS=Rattus norvegicus OX=10116 GN=Itih4 PE=1 SV=3 | 93  | 104027 | 9  |
| 55 | A0A0G2JZL1 | Ig-like domain-containing protein OS=Rattus norvegicus OX=10116 PE=4 SV=1                    | 92  | 15112  | 5  |
| 56 | A0A0G2K828 | Ig-like domain-containing protein OS=Rattus norvegicus OX=10116 PE=4 SV=1                    | 91  | 13442  | 3  |
| 57 | F1LMV6     | Desmoplakin OS=Rattus norvegicus OX=10116 GN=Dsp PE=1 SV=1                                   | 89  | 334582 | 8  |
| 58 | M0RA79     | Ig-like domain-containing protein OS=Rattus norvegicus OX=10116 PE=1 SV=1                    | 83  | 11066  | 3  |
| 59 | A0A0G2K7X7 | Complement C7 OS=Rattus norvegicus OX=10116 GN=C7 PE=1 SV=1                                  | 82  | 96854  | 4  |
| 60 | D3ZFF8     | Ig-like domain-containing protein OS=Rattus norvegicus OX=10116 PE=1 SV=2                    | 81  | 13148  | 6  |

|    |            |                                                                                               |    |        |   |
|----|------------|-----------------------------------------------------------------------------------------------|----|--------|---|
| 61 | A0A0G2K5D2 | Ig-like domain-containing protein OS=Rattus norvegicus OX=10116 PE=1 SV=1                     | 78 | 13658  | 3 |
| 62 | A0A0G2K7S9 | Ig-like domain-containing protein OS=Rattus norvegicus OX=10116 PE=1 SV=1                     | 77 | 13164  | 4 |
| 63 | A0A0G2K896 | Similar to RIKEN cDNA 1300017J02 OS=Rattus norvegicus OX=10116 GN=RGD1310507 PE=1 SV=1        | 77 | 78724  | 4 |
| 64 | P10959     | Carboxylesterase 1C OS=Rattus norvegicus OX=10116 GN=Ces1c PE=1 SV=3                          | 76 | 60479  | 3 |
| 65 | M0RDR6     | Ig-like domain-containing protein OS=Rattus norvegicus OX=10116 PE=4 SV=1                     | 69 | 12884  | 5 |
| 66 | G3V9R9     | Afamin OS=Rattus norvegicus OX=10116 GN=Afm PE=1 SV=1                                         | 69 | 71135  | 5 |
| 67 | M0RBK4     | Ig-like domain-containing protein OS=Rattus norvegicus OX=10116 PE=1 SV=2                     | 69 | 11674  | 1 |
| 68 | A0A0G2K7P6 | IgV domain-containing protein OS=Rattus norvegicus OX=10116 PE=4 SV=1                         | 68 | 10337  | 2 |
| 69 | D3Z9Z0     | Ankyrin 1 OS=Rattus norvegicus OX=10116 GN=Ank1 PE=1 SV=1                                     | 65 | 188206 | 1 |
| 70 | M0R693     | Ig-like domain-containing protein OS=Rattus norvegicus OX=10116 PE=4 SV=1                     | 62 | 12811  | 3 |
| 71 | A0A0G2K5X3 | Ig-like domain-containing protein OS=Rattus norvegicus OX=10116 PE=4 SV=1                     | 60 | 13425  | 2 |
| 72 | D3ZM39     | Desmoglein 1 OS=Rattus norvegicus OX=10116 GN=Dsg1 PE=4 SV=1                                  | 59 | 114980 | 3 |
| 73 | Q5M7T5     | Serine (Or cysteine) peptidase inhibitor, OS=Rattus norvegicus OX=10116 GN=Serpinc1 PE=1 SV=1 | 58 | 52714  | 4 |
| 74 | A0A0G2JUY3 | Ig-like domain-containing protein OS=Rattus norvegicus OX=10116 PE=4 SV=1                     | 58 | 12903  | 2 |
| 75 | A0A0H2UHA1 | Mannan-binding lectin serine protease 1 OS=Rattus norvegicus OX=10116 GN=Masp1 PE=1 SV=1      | 56 | 81715  | 3 |
| 76 | A0A0G2K9R5 | Apolipoprotein C-I OS=Rattus norvegicus OX=10116 GN=ApoC1 PE=4 SV=1                           | 53 | 7557   | 4 |
| 77 | M0R3Q0     | Ig-like domain-containing protein OS=Rattus norvegicus OX=10116 PE=4 SV=1                     | 53 | 11877  | 2 |
| 78 | D3ZWD6     | Complement C8 alpha chain OS=Rattus norvegicus OX=10116 GN=C8a PE=1 SV=1                      | 52 | 67884  | 6 |
| 79 | A0A0G2JSW3 | Globin a4 OS=Rattus norvegicus OX=10116 GN=Hbb PE=1 SV=1                                      | 50 | 16069  | 2 |

The yellow highlighted immunoglobulin, the orange highlighted Ig-like domain-containing protein, the blue highlighted complement C3, the green highlighted serum albumin and the red highlighted other complement proteins.

**Table S3** The list of identified proteins in Band-2.

| #  | prot_acc   | prot_desc                                                                        | prot_score | prot_mass | prot_matches |
|----|------------|----------------------------------------------------------------------------------|------------|-----------|--------------|
| 1  | P20762     | Ig gamma-2C chain C region OS=Rattus norvegicus OX=10116 PE=2 SV=1               | 2253       | 37062     | 98           |
| 2  | A0A0G2JVP4 | Immunoglobulin heavy constant mu OS=Rattus norvegicus OX=10116 GN=Ighm PE=1 SV=1 | 867        | 52360     | 47           |
| 3  | A0A0G2JSH5 | Serum albumin OS=Rattus norvegicus OX=10116 GN=Alb PE=1 SV=1                     | 696        | 70710     | 31           |
| 4  | F1LZ11     | Ig-like domain-containing protein OS=Rattus norvegicus OX=10116 PE=1 SV=1        | 656        | 14286     | 31           |
| 5  | Q4KM75     | CD5 antigen-like OS=Rattus norvegicus OX=10116 GN=Cd51 PE=1 SV=1                 | 533        | 39375     | 30           |
| 6  | P02680     | Fibrinogen gamma chain OS=Rattus norvegicus OX=10116 GN=Fgg PE=1 SV=3            | 513        | 51228     | 26           |
| 7  | M0RBF1     | Complement C3 OS=Rattus norvegicus OX=10116 GN=C3 PE=1 SV=1                      | 508        | 187746    | 31           |
| 8  | Q6P0K8     | Junction plakoglobin OS=Rattus norvegicus OX=10116 GN=Jup PE=1 SV=1              | 288        | 82490     | 21           |
| 9  | F1LWD1     | Ig-like domain-containing protein OS=Rattus norvegicus OX=10116 PE=1 SV=3        | 231        | 14376     | 8            |
| 10 | A0A0G2JY31 | Alpha-1-antiproteinase OS=Rattus norvegicus OX=10116 GN=Serpina1 PE=1 SV=1       | 222        | 46264     | 20           |
| 11 | F1M3X3     | Ig-like domain-containing protein OS=Rattus norvegicus OX=10116 PE=4 SV=2        | 220        | 13177     | 9            |
| 12 | M0R9U2     | Ig-like domain-containing protein OS=Rattus norvegicus OX=10116 PE=1 SV=1        | 216        | 10952     | 7            |
| 13 | D4ACR1     | Ig-like domain-containing protein OS=Rattus norvegicus OX=10116 PE=1 SV=2        | 204        | 13876     | 7            |
| 14 | F7F389     | Complement component C9 OS=Rattus norvegicus OX=10116 GN=C9 PE=1 SV=1            | 202        | 66555     | 14           |
| 15 | F1M3H2     | Ig-like domain-containing protein OS=Rattus norvegicus OX=10116 PE=4 SV=2        | 200        | 11295     | 13           |

|    |            |                                                                                        |     |        |    |
|----|------------|----------------------------------------------------------------------------------------|-----|--------|----|
| 16 | Q68FY4     | Group specific component OS=Rattus norvegicus OX=10116 GN=Gc PE=1 SV=1                 | 194 | 55080  | 12 |
| 17 | A0A0G2JYK0 | Serine protease inhibitor A3N OS=Rattus norvegicus OX=10116 GN=LOC299282 PE=1 SV=1     | 193 | 68226  | 12 |
| 18 | A0A0G2K9B1 | Serine protease inhibitor A3N OS=Rattus norvegicus OX=10116 GN=LOC299282 PE=1 SV=1     | 190 | 48570  | 11 |
| 19 | FILMV6     | Desmoplakin OS=Rattus norvegicus OX=10116 GN=Dsp PE=1 SV=1                             | 183 | 334582 | 23 |
| 20 | A0A0G2K980 | Ig-like domain-containing protein OS=Rattus norvegicus OX=10116 PE=1 SV=1              | 166 | 11344  | 6  |
| 21 | A0A0G2K290 | Ig-like domain-containing protein OS=Rattus norvegicus OX=10116 PE=4 SV=1              | 151 | 14124  | 6  |
| 22 | P14480     | Fibrinogen beta chain OS=Rattus norvegicus OX=10116 GN=Fgb PE=1 SV=4                   | 150 | 54828  | 14 |
| 23 | F1LXY6     | Ig-like domain-containing protein OS=Rattus norvegicus OX=10116 PE=1 SV=2              | 147 | 11354  | 6  |
| 24 | F1LP05     | ATP synthase subunit alpha OS=Rattus norvegicus OX=10116 GN=Atp5f1a PE=1 SV=1          | 136 | 59890  | 10 |
| 25 | F1M1R0     | Ig-like domain-containing protein OS=Rattus norvegicus OX=10116 GN=LOC690813 PE=1 SV=2 | 133 | 15055  | 4  |
| 26 | M0R7Q2     | Ig-like domain-containing protein OS=Rattus norvegicus OX=10116 PE=1 SV=2              | 132 | 13315  | 7  |
| 27 | P20761     | Ig gamma-2B chain C region OS=Rattus norvegicus OX=10116 GN=Igh-1a PE=1 SV=1           | 123 | 37101  | 5  |
| 28 | A0A0G2JUG1 | IF rod domain-containing protein OS=Rattus norvegicus OX=10116 PE=3 SV=1               | 115 | 57880  | 7  |
| 29 | D3ZC54     | Ig-like domain-containing protein OS=Rattus norvegicus OX=10116 PE=1 SV=2              | 106 | 13293  | 4  |
| 30 | A0A0G2JUP5 | Murinoglobulin-1 OS=Rattus norvegicus OX=10116 GN=Mug1 PE=4 SV=1                       | 99  | 162631 | 3  |
| 31 | A0A0G2K151 | Apolipoprotein E OS=Rattus norvegicus OX=10116 GN=ApoE PE=1 SV=1                       | 99  | 41573  | 7  |
| 32 | F1M3E9     | Ig-like domain-containing protein OS=Rattus norvegicus OX=10116 PE=4 SV=3              | 99  | 13894  | 4  |
| 33 | A0A0G2JZW1 | Ig-like domain-containing protein OS=Rattus norvegicus OX=10116 PE=1 SV=1              | 96  | 24607  | 7  |
| 34 | A0A0G2JXK5 | Serine protease inhibitor A3N OS=Rattus norvegicus OX=10116 GN=LOC299282 PE=1 SV=1     | 87  | 46361  | 10 |
| 35 | G3V6D3     | ATP synthase subunit beta OS=Rattus norvegicus OX=10116 GN=Atp5f1b PE=1 SV=1           | 83  | 56309  | 9  |
| 36 | A0A0G2K477 | Immunoglobulin heavy constant mu OS=Rattus norvegicus OX=10116 GN=Ighm PE=4 SV=1       | 80  | 51903  | 10 |
| 37 | A0A0G2K4I8 | Ig-like domain-containing protein OS=Rattus norvegicus OX=10116 PE=1 SV=1              | 80  | 12790  | 9  |
| 38 | F1LWD0     | Ig-like domain-containing protein OS=Rattus norvegicus OX=10116 PE=1 SV=2              | 78  | 12027  | 3  |
| 39 | A0A0G2QC06 | Serotransferrin OS=Rattus norvegicus OX=10116 GN=Tf PE=1 SV=1                          | 76  | 109507 | 6  |
| 40 | M0R757     | Elongation factor 1-alpha OS=Rattus norvegicus OX=10116 GN=LOC100360413 PE=3 SV=1      | 75  | 50418  | 5  |
| 41 | A0A0G2JXB7 | Ig-like domain-containing protein OS=Rattus norvegicus OX=10116 PE=1 SV=1              | 74  | 13110  | 5  |
| 42 | M0RDF2     | Ig-like domain-containing protein OS=Rattus norvegicus OX=10116 PE=1 SV=1              | 71  | 11290  | 5  |
| 43 | A0A0G2K304 | Ig-like domain-containing protein OS=Rattus norvegicus OX=10116 PE=4 SV=1              | 71  | 12752  | 4  |
| 44 | P04639     | Apolipoprotein A-1 OS=Rattus norvegicus OX=10116 GN=Apoa1 PE=1 SV=2                    | 70  | 30100  | 4  |
| 45 | D3ZM39     | Desmoglein 1 OS=Rattus norvegicus OX=10116 GN=Dsg1 PE=4 SV=1                           | 69  | 114980 | 2  |
| 46 | D3ZFF8     | Ig-like domain-containing protein OS=Rattus norvegicus OX=10116 PE=1 SV=2              | 69  | 13148  | 3  |
| 47 | Q7TQ70     | Ac1873 OS=Rattus norvegicus OX=10116 GN=Fga PE=1 SV=1                                  | 66  | 87344  | 13 |
| 48 | A0A0G2K9Y0 | Immunoglobulin heavy constant mu OS=Rattus norvegicus OX=10116 GN=Ighm PE=4 SV=1       | 63  | 52301  | 8  |
| 49 | A0A0G2JWK0 | Integrin beta OS=Rattus norvegicus OX=10116 GN=Itgb3 PE=1 SV=1                         | 62  | 64287  | 1  |
| 50 | A0A0G2K3K2 | Actin, cytoplasmic 1 OS=Rattus norvegicus OX=10116 GN=Actb PE=1 SV=1                   | 62  | 42401  | 4  |
| 51 | D3ZY51     | Plakophilin 1 OS=Rattus norvegicus OX=10116 GN=Pkp1 PE=4 SV=2                          | 60  | 68486  | 4  |
| 52 | A0A0G2JUY3 | Ig-like domain-containing protein OS=Rattus norvegicus OX=10116 PE=4 SV=1              | 56  | 12903  | 1  |
| 53 | D3ZJW6     | RCG21066 OS=Rattus norvegicus OX=10116 GN=rCG_21066 PE=1 SV=1                          | 53  | 13226  | 2  |
| 54 | A0A0G2JT70 | Ig-like domain-containing protein OS=Rattus norvegicus OX=10116 PE=4 SV=1              | 50  | 10463  | 2  |
| 55 | P01048     | T-kininogen 1 OS=Rattus norvegicus OX=10116 GN=Map1 PE=1 SV=2                          | 50  | 48828  | 4  |
| 56 | A0A0G2K5D2 | Ig-like domain-containing protein OS=Rattus norvegicus OX=10116 PE=1 SV=1              | 50  | 13658  | 1  |

The yellow highlighted immunoglobulin, the orange highlighted Ig-like domain-containing protein, the blue highlighted complement C3, the green highlighted serum albumin and the red highlighted other complement proteins.

**Table S4** The list of identified proteins in Band-3.

| #  | prot_acc   | prot_desc                                                                              | prot_score | prot_mass | prot_matches |
|----|------------|----------------------------------------------------------------------------------------|------------|-----------|--------------|
| 1  | F1LTN6     | Uncharacterized protein OS=Rattus norvegicus OX=10116 PE=1 SV=2                        | 2856       | 25184     | 100          |
| 2  | P01836     | Ig kappa chain C region, A allele OS=Rattus norvegicus OX=10116 PE=1 SV=1              | 1399       | 11896     | 46           |
| 3  | A0A0G2JVP4 | Immunoglobulin heavy constant mu OS=Rattus norvegicus OX=10116 GN=Ighm PE=1 SV=1       | 972        | 52360     | 49           |
| 4  | M0RBF1     | Complement C3 OS=Rattus norvegicus OX=10116 GN=C3 PE=1 SV=1                            | 876        | 187746    | 43           |
| 5  | P20762     | Ig gamma-2C chain C region OS=Rattus norvegicus OX=10116 PE=2 SV=1                     | 863        | 37062     | 39           |
| 6  | A0A0G2K5D2 | Ig-like domain-containing protein OS=Rattus norvegicus OX=10116 PE=1 SV=1              | 788        | 13658     | 24           |
| 7  | P02770     | Serum albumin OS=Rattus norvegicus OX=10116 GN=Alb PE=1 SV=2                           | 745        | 70682     | 29           |
| 8  | A0A0G2K0N6 | Ig-like domain-containing protein OS=Rattus norvegicus OX=10116 PE=1 SV=1              | 664        | 10860     | 19           |
| 9  | F1M1R0     | Ig-like domain-containing protein OS=Rattus norvegicus OX=10116 GN=LOC690813 PE=1 SV=2 | 663        | 15055     | 28           |
| 10 | M0RC23     | Ig-like domain-containing protein OS=Rattus norvegicus OX=10116 PE=1 SV=1              | 523        | 11302     | 15           |
| 11 | D3ZBB2     | Ig-like domain-containing protein OS=Rattus norvegicus OX=10116 PE=1 SV=3              | 513        | 13251     | 17           |
| 12 | A0A0G2K3S3 | Ig-like domain-containing protein OS=Rattus norvegicus OX=10116 PE=4 SV=1              | 503        | 14930     | 14           |
| 13 | F1M7B3     | Ig-like domain-containing protein OS=Rattus norvegicus OX=10116 PE=4 SV=2              | 453        | 11304     | 13           |
| 14 | M0RD98     | Ig-like domain-containing protein OS=Rattus norvegicus OX=10116 PE=4 SV=2              | 436        | 13229     | 9            |
| 15 | M0RAV0     | Ig-like domain-containing protein OS=Rattus norvegicus OX=10116 PE=4 SV=1              | 403        | 10237     | 12           |
| 16 | A0A0G2K7P6 | IgV domain-containing protein OS=Rattus norvegicus OX=10116 PE=4 SV=1                  | 385        | 10337     | 20           |
| 17 | A0A0G2JTG4 | Ig-like domain-containing protein OS=Rattus norvegicus OX=10116 PE=4 SV=1              | 341        | 10359     | 13           |
| 18 | A0A0G2JY98 | Ig-like domain-containing protein OS=Rattus norvegicus OX=10116 PE=1 SV=1              | 299        | 15486     | 10           |
| 19 | F1LYF1     | Ig-like domain-containing protein OS=Rattus norvegicus OX=10116 PE=4 SV=3              | 283        | 15381     | 10           |
| 20 | A0A0G2JUY3 | Ig-like domain-containing protein OS=Rattus norvegicus OX=10116 PE=4 SV=1              | 260        | 12903     | 9            |
| 21 | A0A0G2K9Z5 | Ig-like domain-containing protein OS=Rattus norvegicus OX=10116 PE=4 SV=1              | 236        | 13196     | 6            |
| 22 | Q63041     | Alpha-1-macroglobulin OS=Rattus norvegicus OX=10116 GN=A1m PE=1 SV=1                   | 232        | 168388    | 8            |
| 23 | P02680     | Fibrinogen gamma chain OS=Rattus norvegicus OX=10116 GN=Fgg PE=1 SV=3                  | 226        | 51228     | 12           |
| 24 | D3ZZ08     | Ig-like domain-containing protein OS=Rattus norvegicus OX=10116 PE=1 SV=2              | 219        | 13297     | 7            |
| 25 | G3V7N9     | Adiponectin a OS=Rattus norvegicus OX=10116 GN=C1qb PE=1 SV=1                          | 212        | 26859     | 8            |
| 26 | A0A0G2K9B1 | Serine protease inhibitor A3N OS=Rattus norvegicus OX=10116 GN=LOC299282 PE=1 SV=1     | 196        | 48570     | 6            |

|   |            |                                                                                       |     |        |    |  |
|---|------------|---------------------------------------------------------------------------------------|-----|--------|----|--|
| 6 |            |                                                                                       |     |        |    |  |
| 2 | Q4KM75     | CD5 antigen-like OS=Rattus norvegicus OX=10116 GN=Cd5l PE=1 SV=1                      | 184 | 39375  | 17 |  |
| 7 |            |                                                                                       |     |        |    |  |
| 2 | A0A0G2K4K2 | Ig-like domain-containing protein OS=Rattus norvegicus OX=10116 PE=1 SV=1             | 181 | 10515  | 7  |  |
| 8 |            |                                                                                       |     |        |    |  |
| 2 | A0A0G2JWX0 | Ig-like domain-containing protein OS=Rattus norvegicus OX=10116 PE=1 SV=1             | 181 | 15610  | 9  |  |
| 9 |            |                                                                                       |     |        |    |  |
| 3 | A0A0G2K6T8 | Ig-like domain-containing protein OS=Rattus norvegicus OX=10116 PE=4 SV=1             | 173 | 10452  | 8  |  |
| 0 |            |                                                                                       |     |        |    |  |
| 3 | F1LZ11     | Ig-like domain-containing protein OS=Rattus norvegicus OX=10116 PE=1 SV=1             | 171 | 14286  | 5  |  |
| 1 |            |                                                                                       |     |        |    |  |
| 3 | P14480     | Fibrinogen beta chain OS=Rattus norvegicus OX=10116 GN=Fgb PE=1 SV=4                  | 168 | 54828  | 13 |  |
| 2 |            |                                                                                       |     |        |    |  |
| 3 | M0R8G6     | Ig-like domain-containing protein OS=Rattus norvegicus OX=10116 PE=4 SV=2             | 166 | 11167  | 7  |  |
| 3 |            |                                                                                       |     |        |    |  |
| 3 | A0A0G2JYK0 | Serine protease inhibitor A3N OS=Rattus norvegicus OX=10116 GN=LOC299282 PE=1 SV=1    | 164 | 68226  | 8  |  |
| 4 |            |                                                                                       |     |        |    |  |
| 3 | D3ZWC1     | Ig-like domain-containing protein OS=Rattus norvegicus OX=10116 PE=4 SV=2             | 152 | 12466  | 6  |  |
| 5 |            |                                                                                       |     |        |    |  |
| 3 | G3V836     | Clusterin OS=Rattus norvegicus OX=10116 GN=Clu PE=1 SV=1                              | 151 | 52015  | 9  |  |
| 6 |            |                                                                                       |     |        |    |  |
| 3 | A0A0G2QC06 | Serotransferrin OS=Rattus norvegicus OX=10116 GN=Tf PE=1 SV=1                         | 130 | 109507 | 8  |  |
| 7 |            |                                                                                       |     |        |    |  |
| 3 | A0A0G2K3K2 | Actin, cytoplasmic 1 OS=Rattus norvegicus OX=10116 GN=Actb PE=1 SV=1                  | 129 | 42401  | 11 |  |
| 8 |            |                                                                                       |     |        |    |  |
| 3 | Q7TQ70     | Ac1873 OS=Rattus norvegicus OX=10116 GN=Fga PE=1 SV=1                                 | 121 | 87344  | 8  |  |
| 9 |            |                                                                                       |     |        |    |  |
| 4 | M0R9U2     | Ig-like domain-containing protein OS=Rattus norvegicus OX=10116 PE=1 SV=1             | 117 | 10952  | 4  |  |
| 0 |            |                                                                                       |     |        |    |  |
| 4 | A0A0G2JZV7 | Ig-like domain-containing protein OS=Rattus norvegicus OX=10116 PE=1 SV=1             | 114 | 12261  | 2  |  |
| 1 |            |                                                                                       |     |        |    |  |
| 4 | A0A0G2JXK5 | Serine protease inhibitor A3N OS=Rattus norvegicus OX=10116 GN=LOC299282 PE=1 SV=1    | 111 | 46361  | 7  |  |
| 2 |            |                                                                                       |     |        |    |  |
| 4 | P31720     | Complement C1q subcomponent subunit A OS=Rattus norvegicus OX=10116 GN=C1qa PE=1 SV=2 | 108 | 26186  | 5  |  |
| 3 |            |                                                                                       |     |        |    |  |
| 4 | F1M5L5     | Ig-like domain-containing protein OS=Rattus norvegicus OX=10116 PE=1 SV=2             | 108 | 13019  | 11 |  |
| 4 |            |                                                                                       |     |        |    |  |
| 4 | P20767     | Ig lambda-2 chain C region OS=Rattus norvegicus OX=10116 PE=4 SV=1                    | 104 | 11482  | 5  |  |
| 5 |            |                                                                                       |     |        |    |  |
| 4 | D4A3L8     | Ig-like domain-containing protein OS=Rattus norvegicus OX=10116 PE=4 SV=2             | 95  | 14798  | 6  |  |
| 6 |            |                                                                                       |     |        |    |  |
| 4 | F1LXY6     | Ig-like domain-containing protein OS=Rattus norvegicus OX=10116 PE=1 SV=2             | 92  | 11354  | 3  |  |
| 7 |            |                                                                                       |     |        |    |  |
| 4 | P04639     | Apolipoprotein A-I OS=Rattus norvegicus OX=10116 GN=Apoa1 PE=1 SV=2                   | 90  | 30100  | 5  |  |

|   |            |                                                                                  |    |       |    |  |
|---|------------|----------------------------------------------------------------------------------|----|-------|----|--|
| 8 |            |                                                                                  |    |       |    |  |
| 4 | A0A0G2JY31 | Alpha-1-antiproteinase OS=Rattus norvegicus OX=10116 GN=Serpina1 PE=1 SV=1       | 89 | 46264 | 13 |  |
| 9 |            |                                                                                  |    |       |    |  |
| 5 | A0A0G2JZS9 | Ig-like domain-containing protein OS=Rattus norvegicus OX=10116 PE=1 SV=1        | 87 | 10918 | 3  |  |
| 0 |            |                                                                                  |    |       |    |  |
| 5 | M0RAB8     | Ig-like domain-containing protein OS=Rattus norvegicus OX=10116 PE=4 SV=2        | 85 | 11205 | 1  |  |
| 1 |            |                                                                                  |    |       |    |  |
| 5 | D3ZPL2     | Ig-like domain-containing protein OS=Rattus norvegicus OX=10116 PE=1 SV=3        | 84 | 11433 | 2  |  |
| 2 |            |                                                                                  |    |       |    |  |
| 5 | M0R7Q2     | Ig-like domain-containing protein OS=Rattus norvegicus OX=10116 PE=1 SV=2        | 80 | 13315 | 2  |  |
| 3 |            |                                                                                  |    |       |    |  |
| 5 | G3V6G1     | Immunoglobulin joining chain OS=Rattus norvegicus OX=10116 GN=Jchain PE=1 SV=1   | 80 | 18229 | 3  |  |
| 4 |            |                                                                                  |    |       |    |  |
| 5 | D3ZQR5     | Ig-like domain-containing protein OS=Rattus norvegicus OX=10116 PE=1 SV=1        | 80 | 12873 | 2  |  |
| 5 |            |                                                                                  |    |       |    |  |
| 5 | D3ZC54     | Ig-like domain-containing protein OS=Rattus norvegicus OX=10116 PE=1 SV=2        | 76 | 13293 | 2  |  |
| 6 |            |                                                                                  |    |       |    |  |
| 5 | F7F389     | Complement component C9 OS=Rattus norvegicus OX=10116 GN=C9 PE=1 SV=1            | 75 | 66555 | 6  |  |
| 7 |            |                                                                                  |    |       |    |  |
| 5 | A0A0G2K290 | Ig-like domain-containing protein OS=Rattus norvegicus OX=10116 PE=4 SV=1        | 75 | 14124 | 4  |  |
| 8 |            |                                                                                  |    |       |    |  |
| 5 | P55159     | Serum paraoxonase/arylesterase 1 OS=Rattus norvegicus OX=10116 GN=Pon1 PE=1 SV=3 | 74 | 39561 | 3  |  |
| 9 |            |                                                                                  |    |       |    |  |
| 6 | Q6P0K8     | Junction plakoglobin OS=Rattus norvegicus OX=10116 GN=Jup PE=1 SV=1              | 71 | 82490 | 8  |  |
| 0 |            |                                                                                  |    |       |    |  |
| 6 | M0R4Z4     | Ig-like domain-containing protein OS=Rattus norvegicus OX=10116 PE=1 SV=2        | 71 | 13448 | 5  |  |
| 1 |            |                                                                                  |    |       |    |  |
| 6 | A0A0G2K151 | Apolipoprotein E OS=Rattus norvegicus OX=10116 GN=ApoE PE=1 SV=1                 | 71 | 41573 | 4  |  |
| 2 |            |                                                                                  |    |       |    |  |
| 6 | A0A0G2K4I8 | Ig-like domain-containing protein OS=Rattus norvegicus OX=10116 PE=1 SV=1        | 70 | 12790 | 3  |  |
| 3 |            |                                                                                  |    |       |    |  |
| 6 | F1M3X3     | Ig-like domain-containing protein OS=Rattus norvegicus OX=10116 PE=4 SV=2        | 69 | 13177 | 2  |  |
| 4 |            |                                                                                  |    |       |    |  |
| 6 | A0A0G2K7I1 | Ig-like domain-containing protein OS=Rattus norvegicus OX=10116 PE=1 SV=1        | 68 | 10253 | 2  |  |
| 5 |            |                                                                                  |    |       |    |  |
| 6 | A0A0G2K9Y0 | Immunoglobulin heavy constant mu OS=Rattus norvegicus OX=10116 GN=IGHM PE=4 SV=1 | 66 | 52301 | 3  |  |
| 6 |            |                                                                                  |    |       |    |  |
| 6 | M0R5W6     | Ig-like domain-containing protein OS=Rattus norvegicus OX=10116 PE=4 SV=1        | 65 | 12874 | 4  |  |
| 7 |            |                                                                                  |    |       |    |  |
| 6 | M0R816     | Ig-like domain-containing protein OS=Rattus norvegicus OX=10116 PE=1 SV=2        | 65 | 10746 | 2  |  |
| 8 |            |                                                                                  |    |       |    |  |
| 6 | M0RBK4     | Ig-like domain-containing protein OS=Rattus norvegicus OX=10116 PE=1 SV=2        | 64 | 11674 | 5  |  |
| 9 |            |                                                                                  |    |       |    |  |
| 7 | M0RBP7     | Ig-like domain-containing protein OS=Rattus norvegicus OX=10116 PE=4 SV=1        | 64 | 12890 | 3  |  |



|   |            |                                                                                              |    |        |   |
|---|------------|----------------------------------------------------------------------------------------------|----|--------|---|
| 0 |            |                                                                                              |    |        |   |
| 7 | A0A0G2K099 | Uncharacterized protein OS=Rattus norvegicus OX=10116 PE=1 SV=1                              | 64 | 54490  | 3 |
| 1 |            |                                                                                              |    |        |   |
| 7 | A0A0G2K458 | Ig-like domain-containing protein OS=Rattus norvegicus OX=10116 PE=4 SV=1                    | 63 | 12809  | 2 |
| 2 |            |                                                                                              |    |        |   |
| 7 | A0A0G2JZN1 | Ig-like domain-containing protein OS=Rattus norvegicus OX=10116 PE=1 SV=1                    | 61 | 10470  | 4 |
| 3 |            |                                                                                              |    |        |   |
| 7 | A0A0G2K3E0 | Aquaporin-1 OS=Rattus norvegicus OX=10116 GN=Aqp1 PE=1 SV=1                                  | 59 | 26524  | 2 |
| 4 |            |                                                                                              |    |        |   |
| 7 | A0A0G2JSK1 | RCG20603 OS=Rattus norvegicus OX=10116 GN=Serpina3c PE=3 SV=1                                | 59 | 46676  | 4 |
| 5 |            |                                                                                              |    |        |   |
| 7 | FILMV6     | Desmoplakin OS=Rattus norvegicus OX=10116 GN=Dsp PE=1 SV=1                                   | 58 | 334582 | 6 |
| 6 |            |                                                                                              |    |        |   |
| 7 | FILWD0     | Ig-like domain-containing protein OS=Rattus norvegicus OX=10116 PE=1 SV=2                    | 56 | 12027  | 3 |
| 7 |            |                                                                                              |    |        |   |
| 7 | D3ZFC6     | Inter-alpha-trypsin inhibitor heavy chain 4 OS=Rattus norvegicus OX=10116 GN=Itih4 PE=1 SV=3 | 55 | 104027 | 2 |
| 8 |            |                                                                                              |    |        |   |
| 7 | P19939     | Apolipoprotein C-I OS=Rattus norvegicus OX=10116 GN=Apoc1 PE=3 SV=1                          | 55 | 9854   | 4 |
| 9 |            |                                                                                              |    |        |   |
| 8 | G3V7I0     | Peroxiredoxin 3 OS=Rattus norvegicus OX=10116 GN=Prdx3 PE=1 SV=1                             | 55 | 28567  | 2 |
| 0 |            |                                                                                              |    |        |   |
| 8 | D3ZY51     | Plakophilin 1 OS=Rattus norvegicus OX=10116 GN=Pkp1 PE=4 SV=2                                | 53 | 68486  | 1 |
| 1 |            |                                                                                              |    |        |   |
| 8 | A0A0G2JSW3 | Globin a4 OS=Rattus norvegicus OX=10116 GN=Hbb PE=1 SV=1                                     | 52 | 16069  | 2 |
| 2 |            |                                                                                              |    |        |   |
| 8 | A0A0G2JUP5 | Murinoglobulin-1 OS=Rattus norvegicus OX=10116 GN=Mug1 PE=4 SV=1                             | 50 | 162631 | 2 |
| 3 |            |                                                                                              |    |        |   |

The yellow highlighted immunoglobulin, the orange highlighted Ig-like domain-containing protein, the blue highlighted complement C3, the green highlighted serum albumin and the red highlighted other complement proteins.
